# Supplementary material
Source: ML conference proceedings conference paper supplement (https://openreview.net/forum?id=TzNuIdrHoU)
Supplement: supplementary_material [file attachment]

**RESEARCH CONSENT FORM**

**Basic Information**

Title of Project: An open-world simulated environment towards generally capable agents

Principal Investigator: Kanjun Qiu

kanjun@generallyintelligent.ai

253 Collingwood St, San Francisco, CA 94114

Study Phone Number: 630-803-8449

**Overview**

We are asking you to be in a research study. A research study is an organized way of collecting information about scientific questions. This form will tell you what you should expect if you agree to be in the study. There are programs in place to make sure that investigators fulfill their obligations listed in this form.

It is your decision whether or not to join the study. We are asking you to be in this study because you expressed interest through our online sign-up form. We are doing the research to collect human performance data to compare to AI agents’ performance in our open-world simulated environment. If you agree, you will, will play a virtual reality (VR) “game” in which you complete various survival tasks. You will be in the study for 7 days if you decide to stay for the whole study. You will find more information about what will happen in this study later in this form.

The main risks of being in the study are cybersickness from the VR environment/headset and boredom from completing 7 hours of gameplay in the span of a few days. You will find more information about risks later in this form.

You might benefit from being in the study because we will thank you in our research paper and compensate you either with a free Oculus or commensurate monetary compensation. You will find more information about benefits later in this form.

**Purpose**

We want to enable the research and development of more general artificially intelligent agents—those that can accomplish a wide range of goals in a wide range of environments. To this end, we are building a simulated 3D world to allow researchers to set up and evaluate many visuomotor tasks that primates (including humans) do for basic survival. The purpose of this study is to collect human performance data on these tasks in our simulated world that we can then use to compare against the AI agents’ performance.

**What Will Happen in This Research Study**

This study requires you to set up and play a VR “game”. It is estimated that set up will take ~3 hours, and we require an additional 7+ hours of gameplay. The study can be completed remotely in your home or wherever you can find the time/space to play.

**Procedure**

- By Tuesday, May 31st
  - Receive your Oculus headset (if you don’t already have one)
  - Receive instructions on how to set up your environment for gameplay
- Wednesday, June 1st –  Thursday, June 2nd
  - Set up your environment
  - Watch a tutorial
  - Complete a few test rounds to make sure everything is running smoothly
  - About 3 hours needed
- Friday, June 3rd – Monday, June 6th
  - Live data collection period during which you will be asked to independently complete a variety of tasks with your Oculus headset
  - About 7 hours needed, though more is welcome

Note that you can set up your headset as soon as it/set up instructions are delivered to you. You might want to do this if you’ll need a longer data collection period than the one specified above.

The ways we will protect your privacy and confidentiality are described in a separate section later in this form.

**Risks and Discomforts**

The following risks and potential discomforts should be considered:

- “Cybersickness” from the VR environment/headset
- Boredom from completing 7 hours of gameplay in the span of a few days

Some symptoms of cybersickness include:

- loss of spatial awareness
- nausea
- dizziness
- disorientation

Other short-term effects following VR use include:

- eye soreness and trouble focusing
- impaired hand-eye coordination
- reduced depth perception
- decreased reaction time
- loss of balance
- prolonged nausea

You should seek immediate medical attention if you experience any of these symptoms for a prolonged period of time.

If you decide that you want to stop being in the study, we ask that you let us know by emailing Nicole at nicole@generallyintelligent.ai. If you stop early, you will be asked to return your Oculus headset in working condition (if you received one through the study) and will only receive compensation for the completed time after we receive the headset.

**Potential Benefits**

The benefits of being in this study may be: being thanked in an AI research paper. However, you may not receive any benefit if you withdraw from the study or if your data is, for some other unforeseeable reason, not included in the final results. The primary goal of this research is to collect information about the scientific questions asked in this study. Your being in the study may help the investigators learn human performance baselines in our simulated world.

**Costs**

There are no costs to you for being in this research study.

**Payment**

You will receive a free Oculus headset or, if you already have one, commensurate hourly compensation at a rate of $30/hour.

If you opt to receive an Oculus headset, this form of payment will be delivered before the study begins, and you are welcome to keep the headset when the study ends.

If you opt to receive cash payment, you will be asked to submit the hours competed for the study after completion. Submit hours to Lauren at [ap@generallyintelligent.ai](mailto:ap@generallyintelligent.ai) and cc Nicole at [nicole@generallyintelligent.ai](mailto:nicole@generallyintelligent.ai). After your hours are submitted, you will be asked for payment details (such as bank information), and payment will be remitted within 60 days.

If you end up dedicating more than 10 hours to this study, you will be paid for any overage time at $30/hour regardless of whether or not you received an Oculus headset.

If you withdraw from the study, you will be asked to return your Oculus headset (if applicable) and will receive compensation for the completed hours once we receive the headset in working condition.

**Confidentiality**

We must use information that shows your identity to do this research. Information already collected about you will remain in the study record even if you later withdraw.

We will store your information in ways we think are secure. We will store electronic files in computer systems with password protection and encryption. Only the people listed later in this section will be given access to your information. However, we cannot guarantee complete confidentiality.

This study gives you the option of communicating using non-secure email, phone, and text messages. This is because some people like the option of communicating by email and/or text message. It is important for you to understand that regular email and text are convenient but are generally not secure. As a result, information about you could be intercepted by someone not involved with the study. We will give you the option of using non-secure email, phone, or text messages to communicate with our team during the study.

If you agree to be in the study and sign this form, we will share information that may show your identity with the following groups of people:

- People who do the research or help oversee the research, including safety monitoring.
- Any people who you give us separate permission to share your information.

We will share research data where we have removed anything that we think would show your identity. There still may be a small chance that someone could figure out that the information is about you. Such sharing includes:

- Publishing results in a book or journal.
- Using research data in future studies, done by us or by other scientists.

**Re-Contact**

We would like to ask your permission to contact you again in the future. This contact would be after the study has ended. Please initial your choice below:

____Yes ____No You may contact me again to ask for additional information related to this study

____Yes ____No You may contact me again to let me know about a different research study

**Subject’s Rights**

By consenting to be in this study you do not waive any of your legal rights. Consenting means that you have been given information about this study and that you agree to participate in the study. You will be given a copy of this form to keep.

If you do not agree to be in this study or if at any time you withdraw from this study you will not suffer any penalty or lose any benefits to which you are entitled. Your participation is completely up to you. You will only be paid for the study activities that you complete before withdrawing.

We may decide to have you stop being in the study even if you want to stay. Some reasons this could happen are if staying in the study may be bad for you, or if the study is stopped.

**Questions**

The investigator or a member of the research team will try to answer all of your questions. If you have questions or concerns at any time, contact Nicole Seo at 203-451-1589. Also call if you need to report an injury while being in this research.

**Subject:** _____________________________________________

Printed name of subject

**DOB:** _________________

MM/DD/YYYY

**Gender:** _______________

Male, female, or unspecified

By signing this consent form, you are indicating that

- you have read this form (or it has been read to you)
- your questions have been answered to your satisfaction
- you voluntarily agree to participate in this research study
- you permit the use and sharing of information that may identify you as described

*To be completed by subject if personally signing*

_____________________________________________ ___________

Signature of subject Date

*To be completed by LAR if subject does not personally sign*

I am providing consent on behalf of the subject.

_____________________________________________ ________________________________

Printed name of Legally Authorized Representative (LAR) Relationship to Subject

_____________________________________________ ___________

Signature of Legally Authorized Representative Date

**Researcher:** Nicole Seo

*To be completed by researcher if subject personally signs*

I have personally explained the research to the above-named subject and answered all questions. I believe that the subject understands what is involved in the study and freely agrees to participate.

_____________________________________________ ___________

Signature of person conducting consent discussion Date

*To be completed by researcher if subject does not personally sign*

I have personally explained the research to the above-named subject’s Legally Authorized Representative and answered all questions. I believe that the Legally Authorized Representative understands what is involved in the study and freely agrees to have the subject participate. I consider that the above-named subject (check one):

🞏 is capable of understanding what is involved in the study and freely agrees to participate.

🞏 is not capable of understanding what is involved in the study.

_____________________________________________ ___________

Signature of person conducting consent discussion Date
